# Supplementary material for: Bioresistive random access memory with an in-memory computing function based on graphene quantum dots
Source: Royal Society of Chemistry journal article supplement (doi:10.1039/d3nj00076a), 2023-01-01
Supplement: d3nj00076a2.pdf [file d3nj00076a2.pdf]

# Bioresistive random access memory with an in-memory computing function based on graphene quantum dots

*Lu Wang\*, Yuting Wang, Jing Yang, Wenhao Li and Dianzhong Wen*

*School of Electronic Engineering, Heilongjiang University, Harbin 150080, China*

*HLJ Province Key Laboratory of Senior-Education for Electronic Engineering,*

*Heilongjiang University, Harbin 150080, China*

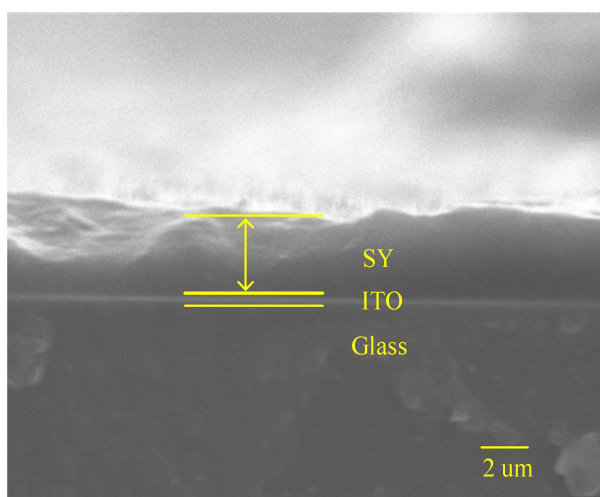

Fig. S1 SEM image of the SY film

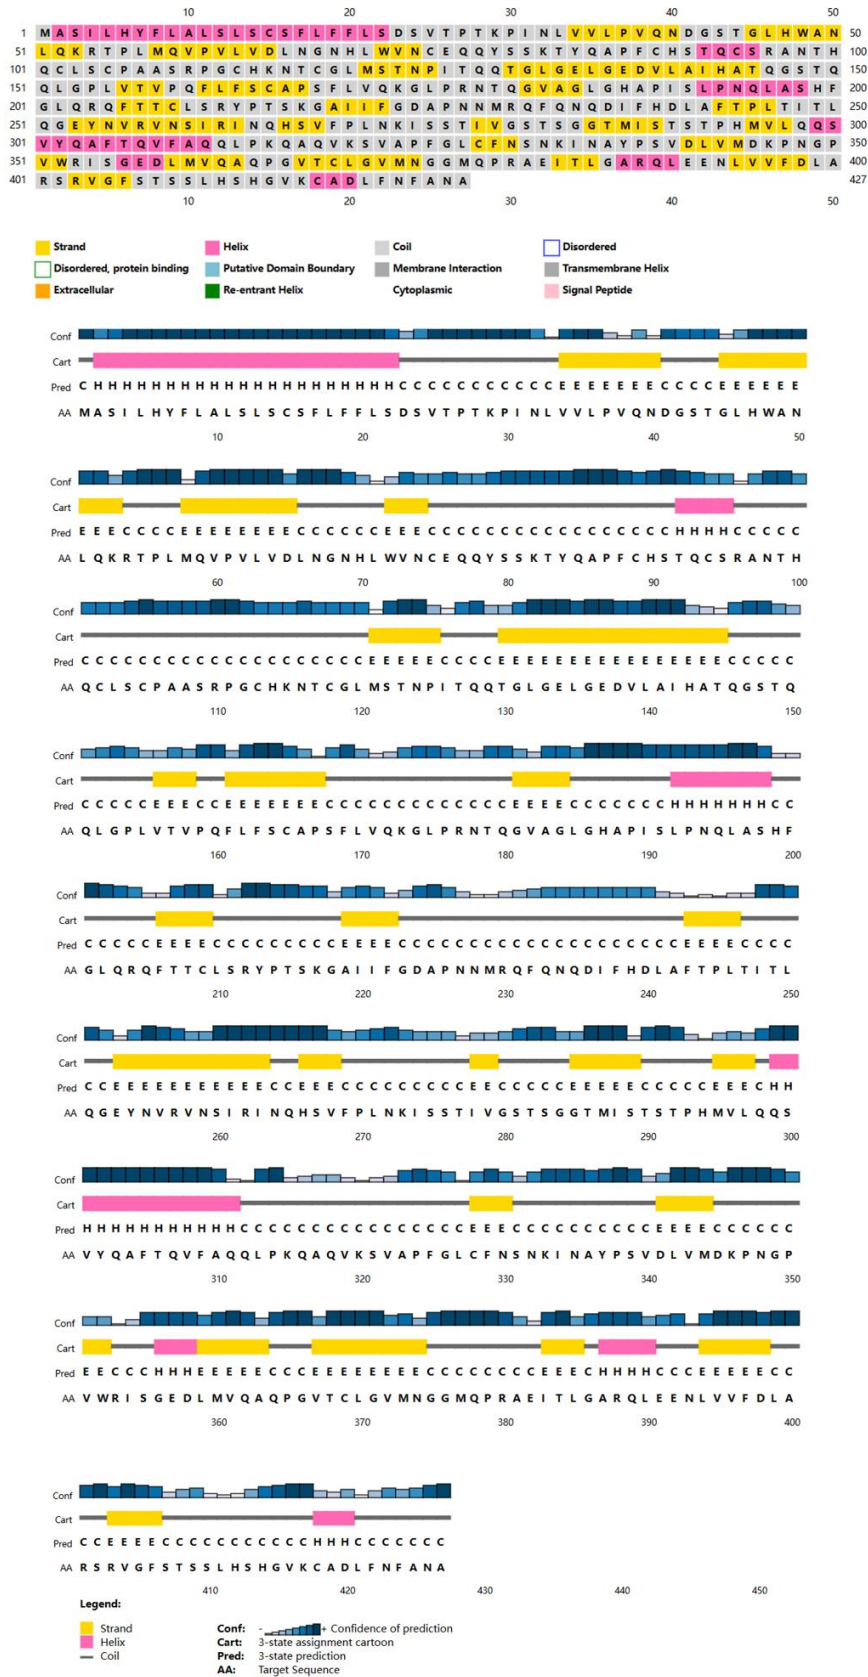

Fig. S2 Secondary structure of soya protein by the prediction of PSIPRED online server<sup>1</sup>: 7S globulin.

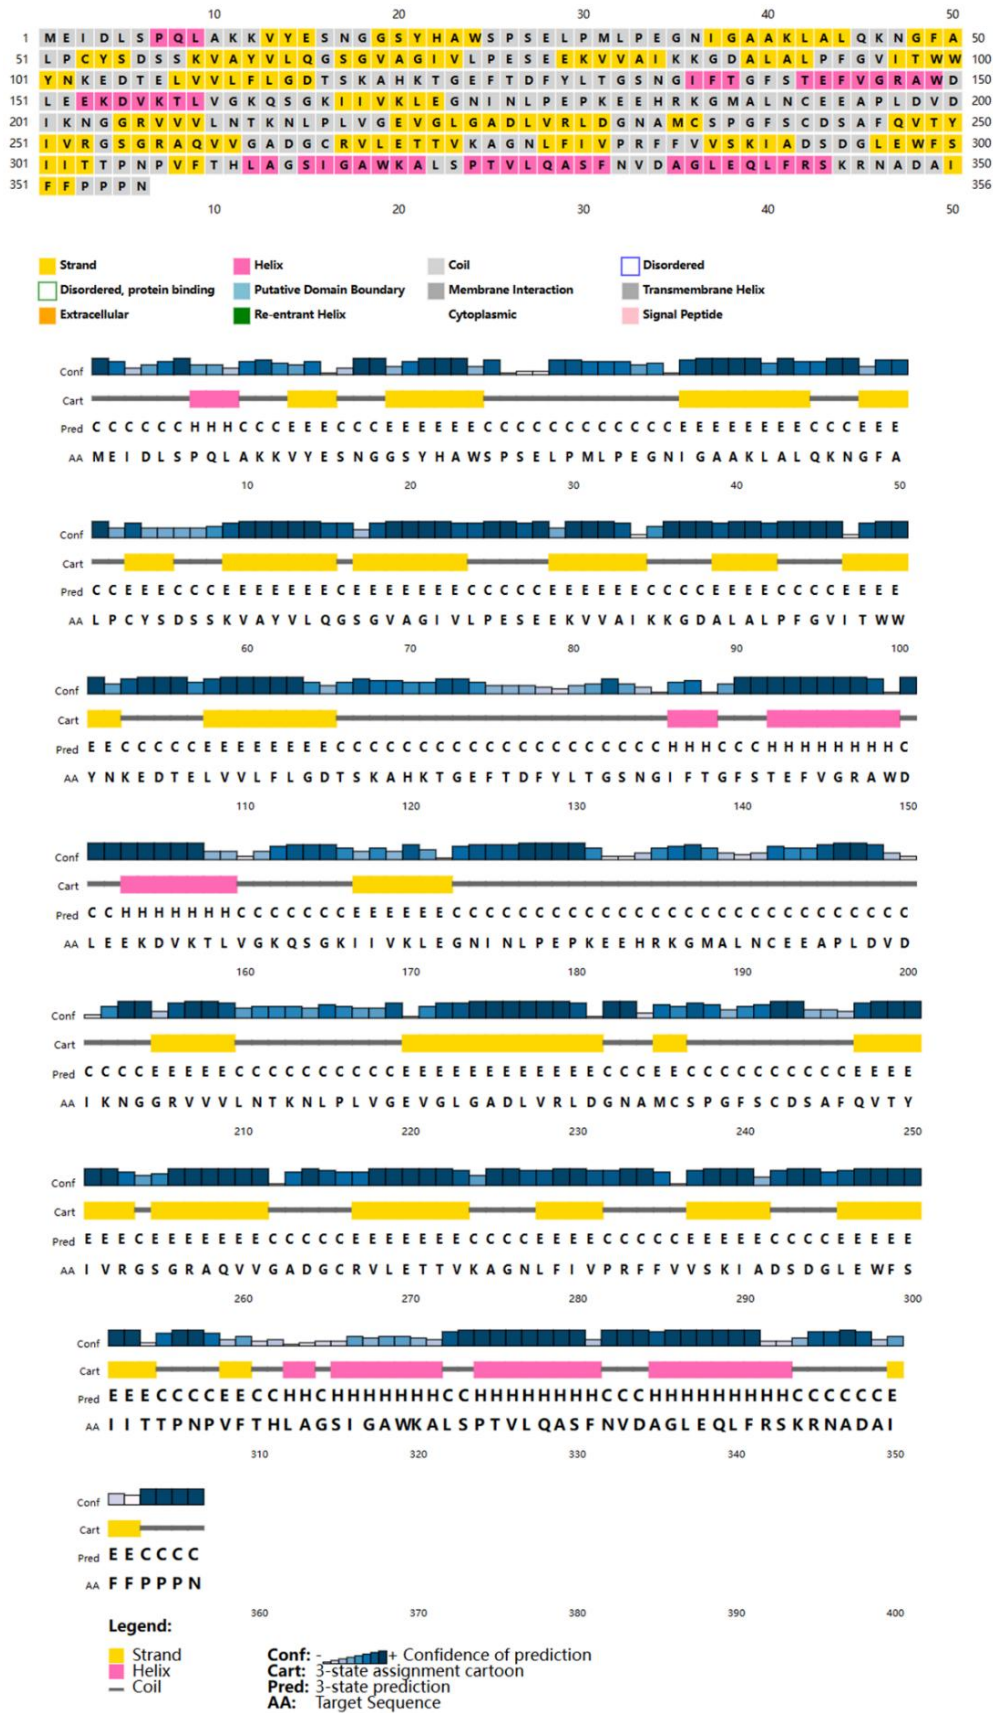

Fig. S3 Secondary structure of soya protein by the prediction of PSIPRED online server<sup>1</sup>: 11S globulin.

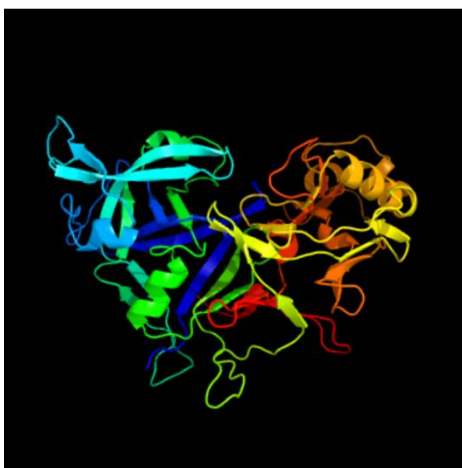

Fig. S4 Three-dimensional structure of soya protein predicted by the Phyre2 web server2: 7S globulin.

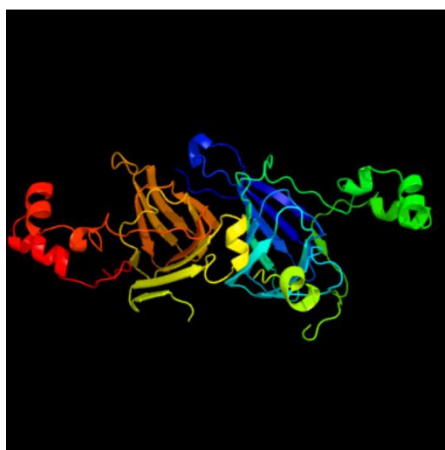

Fig. S5 Three-dimensional structure of soya protein predicted by the Phyre2 web server2: 11S globulin.
